# Supplementary material for: SCIATRAN software package (V4.6): update and further development of aerosol, clouds, surface reflectance databases and models
Source: Copernicus journal article supplement (doi:10.5194/gmd-2022-153), 2022-07-01
Supplement: Supplementary file [file gmd-2022-153-AC3-supplement.pdf]

Dear Dr. Juan A. Añel,

Thanks for the valuable comment, which helps to improve the way to release the software to users. The detailed reply is addressed below in blue.

Best regards,

Linlu Mei on behalf of all co-authors

Dear authors,

Unfortunately, after checking your manuscript, it has come to our attention that it does not comply with our "Code and Data Policy".

[https://www.geoscientific-model-development.net/policies/code\\_and\\_data\\_policy.html](https://www.geoscientific-model-development.net/policies/code_and_data_policy.html)

You have archived your code on a server at the University of Bremen. However, this is not a suitable repository. You must use other alternatives for long-term archival and publishing (check those listed in our policy). Therefore, please, publish your code in one of the appropriate repositories, and reply to this comment with the relevant information (link and DOI) as soon as possible, as it should be available for the Discussions stage. Also, please, include the relevant primary input/output data. In this way, you must include the modified 'Code and Data Availability' section in a potential reviewed version of your manuscript, the DOI of the code (and another DOI for the dataset if necessary).

Please, note that currently, on the web page of the University of Bremen, it reads that it is necessary to register to get access to the code, and this is against the policy of our journal. Therefore, when uploading the code to the new repository, you must make it available to anyone without registering, logging in, etc.

Be aware that failing to comply with this request will result in the rejection of your manuscript for publication.

Regards,

Juan A. Añel

Geosci. Model Dev. Exec. Editor

**Citation:** <https://doi.org/10.5194/gmd-2022-153-CEC1>

Response: The current version of SCIATRAN is available from the institution website: <https://www.iup.uni-bremen.de/sciatran/> under the LGPL licence.

The exact version of the model and input data used to produce the results used in this paper is archived on Zenodo ([10.5281/zenodo.7376666](https://doi.org/10.5281/zenodo.7376666)).
